## **Impact of immediate cryopreservation on the establishment of patient derived xenografts from head and neck cancer patients.**

Lindsey Abel<sup>1</sup>, Arda Durmaz<sup>5</sup>, Rong Hu<sup>2</sup>, Colin Longhurst<sup>3,4</sup>, Jacob G. Scott<sup>5</sup>, Randall J. Kimple<sup>1,4</sup>

<sup>1</sup>Department of Human Oncology,

<sup>2</sup>Department of Pathology

<sup>3</sup>Department of Biostatistics and Medical Informatics

<sup>4</sup>Carbone Comprehensive Cancer Center,

University of Wisconsin School of Medicine and Public Health

Madison, WI, USA

<sup>5</sup>Departments of Translational Hematology and Oncology Research and Radiation Oncology, Cleveland Clinic, Cleveland, OH, USA

Corresponding Author: Dr. Randall J. Kimple  
Department of Human Oncology  
University of Wisconsin-Madison  
1111 Highland Avenue  
3107 WIMR  
Madison, WI 53705-2275  
(608) 263-8500  
[rkimple@humonc.wisc.edu](mailto:rkimple@humonc.wisc.edu)

Conflicts of Interest: The authors report no conflicts of interest. All authors have approved the final article. This project was supported in part by the University of Wisconsin Carbone Cancer Center Support Grant (NIH P30 CA014520) and the Wisconsin Head and Neck Cancer SPORE Grant (NIH P50 DE026787).

## **Abstract**

### **Background**

Patient-derived xenografts established from human cancers are important tools for investigating novel anti-cancer therapies. Establishing PDXs requires a significant investment and many PDXs may be used infrequently due to their similarity to existing models, their growth rate, or the lack of relevant mutations. We performed this study to determine whether we could efficiently establish PDXs after cryopreservation to allow molecular profiling to be completed prior to implanting the human cancer.

### **Methods**

Fresh tumor was split with half used to establish a PDX immediately and half cryopreserved for later implantation. Resulting tumors were assessed histologically and tumors established from fresh or cryopreserved tissues compared as to the growth rate, extent of tumor necrosis, mitotic activity, keratinization, and grade. All PDXs were subjected to short tandem repeat testing to confirm identity and assess similarity between methods.

### **Results**

Tumor growth was seen in 70% of implanted cases. No growth in either condition was seen in 30% of tumors. One developed a SCC from the immediate implant but a lymphoproliferative mass without SCC from the frozen specimen. No difference in growth rate was seen. No difference between histologic parameters was seen between the two approaches.

### **Conclusion**

Fresh human cancer tissue can be immediately cryopreserved and later thawed and implanted to establish PDXs. This resource saving approach allows for tumor profiling prior to implantation into animals thus maximizing the probability that the tumor will be utilized for future research.

## **Introduction:**

Patient derived xenografts (PDXs) are important tools for investigating novel anti-cancer therapies, elucidating mechanisms of oncogenesis and therapeutic response, and understanding drivers of therapeutic resistance and tumor evolution. PDXs represent a valuable resource for pre-clinical translational oncology as they allow investigators to sample the heterogeneity within a population of cancer patients. When properly managed, PDXs are a renewable resource that can be made available through biobanking for drug screening, therapeutic development, mechanistic confirmation, and basic science discovery (1,2).

The process of generating PDX involves a highly coordinated effort on the part of multiple entities. Individuals must work together to collect time and temperature sensitive samples while complying with federal and state regulations to protect patients and their personal data. The most common approach to establishing PDXs, and the one used at our institution, involves obtaining fresh tissue and as quickly as possible implanting the tissue into recipient mice (3,4). We have previously demonstrated that this implantation can occur up to 48 hours after donation, if the tissue is appropriately stored (4). Resulting PDXs can be cryopreserved or passaged for experiments or expansion but are typically used within five to ten passages. Initial tumor implantation and growth often occurs at the same time as detailed genomic or transcriptomic analysis thus resulting in significant costs (mice, cage charges) dedicated to the generation of PDXs which may find little subsequent use due to duplication of specific subtypes that have been previously established.

We performed this study to provide evidence that we can immediately cryopreserve tumor specimens and later thaw them to use for PDX establishment rather than immediately implanting all tissue specimens. In cases where sufficient tumor was present to enable both immediate implantation and cryopreservation, we compared PDX establishment success rates and tumor histology between the two approaches. It is our hope that this evidence will enable investigators to maximize resources by only establishing PDXs that meet specific criteria necessary for future experiments by allowing time for tissue characterization (i.e. specific cancer diagnosis, mutational profile, tumor biomarkers) prior to implantation and expansion in animals.

## **Materials and Methods:**

### ***Receiving and Processing primary (P0) tumor tissue***

We have previously described our approach to establishing PDXs (3,4). Briefly, fresh tumor tissue was obtained from patients consented for deidentified excess tissue donation under an IRB approved protocol via the institutional Translational Sciences Biobank (IRB #UW-2016-0934, expiration 8/11/2020). PDXs were established under an IRB-exempt protocol utilizing this de-identified, residual tissue (IRB exemption #2016-0570). Tissue was stored for less than 48 hours in DMEM (catalog number 10-013-CV) at 4°C prior to transfer to the investigational team. In cases in which at least 0.6 g of tissue were provided, samples were processed for engraftment and cryopreservation. Briefly, tissue was rinsed and cleared of blood and/or necrotic tissue, placed into 400 µl of prepared PDX media, and minced with sharp, sterile scissors to obtain a slurry. This slurry was divided equally: half used for implantation into animals and half for cryopreservation. PDX media and phosphate buffered saline was prepared fresh per recipe as previously described (3–5).

### ***Tissue Cryopreservation***

Minced tissue was pipetted from the Eppendorf tube and placed into a cryovial. PDX media was used to bring the total volume to 540 µl prior to addition of 60 µl of DMSO (final volume of 600 µl). The sample was mixed by repeated gentle manual pipetting (10 times). Tissue was placed in a controlled rate freezer container (Bel-Art Cat #F18844-0000) filled according to manufacturer instructions with room temperature isopropanol. The entire container was placed in a –80°C freezer for 24 hours prior to transfer of cryovials to a vapor phase liquid nitrogen freezer for long-term storage at -148°C.

### ***Tissue reanimation***

Cryopreserved patient tissue was removed from its liquid nitrogen storage and placed in a warm bead bath at 37°C. Immediately after tissue was thawed, it was pipetted from the cryovial into a 1.5ml Eppendorf tube filled with 600 µl of 1X PBS. The mixture was pelleted by centrifugation at 200 x g for 2 minutes at 4°C. The supernatant was removed, the cell pellet resuspended in PBS, and the pelleting step repeated. Depending on the amount of tissue and the number of sites to be engrafted, the cell pellet was resuspended with 200-400 µl of PDX media.

### ***Tissue engraftment to SCID mice***

Tumor engraftment was performed as previously described (3,4). All animal studies were performed under an IACUC approved protocol (UW IACUC #M005974) in accordance with

standards for ethical animal care. Briefly, 4-6 week old male and female NOD-SCID gamma (NSG, NOD.Cg-*Prkdc*<sup>scid</sup> *Il2rg*<sup>tm1Wjl</sup>/SzJ) mice have prepared tumor tissue injected subcutaneously into the flank. Tumor in PDX media is mixed in a 1:1 ratio with Matrigel (Corning, cat #CB 40234C) by gentle pipetting and stored on ice to prevent polymerization. Animals are anesthetized using isoflurane, tumor tissue is implanted using a 18g needle using 100-200  $\mu$ l of tumor-Matrigel slurry. Following removal of the needle, the site was reapproximated using a gentle pinch for 10-20 seconds to minimize leakage. Animals were returned to their cages and monitored until they had recovered from anesthesia.

Mice were monitored weekly until tumors reached a size of at least 500mm<sup>3</sup>. To harvest tissue for analysis, mice were euthanized using CO<sub>2</sub> and cervical dislocation. Tumors were collected and divided for multiple uses: formalin fixation and paraffin embedding, flash frozen tissue, and cryopreservation. The remaining tissue was engrafted into another SCID mouse for successive passages.

### ***Histologic analysis***

A fraction of retrieved tumor from the NSG mice was fixed by 10% formalin and processed for routine paraffin embedding. Paraffin embedded sections (5  $\mu$ m) were stained with hematoxylin and eosin (H&E) for histopathological evaluation by a board-certified pathologist specializing in Head and Neck Pathology. Histologic diagnosis, extent of tumor necrosis, mitotic activity, presence of keratinization and tumor grade (well, moderately and poorly differentiated) were analyzed.

### ***Short Tandem Repeat Testing***

Short tandem repeat (STR) testing was performed to confirm the identity of PDXs. Briefly, DNA was prepared from fast frozen tissue or paraffin embedded tissue using Qiagen DNeasy Blood and Tissue kit (Catalog #69504). DNA was sent to Genetica Labcorp for STR testing and profiles compared between patient and PDX as previously described (6).

### ***Statistical Analysis***

To assess if there was a significant difference in direct vs. frozen implantation methods with respect to days-until-passage, a paired t-test was ran at the patient level. To assess if there were differences in implantation methods with regards to keratin pearl, mitosis or necrosis, separate linear mixed models were fit in R (3.6.2), where patient was modeled as random effect. The resulting p-values were estimated using Satterthwaite's approximation.

## **Results**

### *Efficiency of PDX Tumor Establishment*

Ten individual patient tissues were received from the Biobank. Tissues were split and implanted under two conditions: 1) fresh tissue procured and implanted within 48 hours of receipt; and, 2) frozen tissue, cryopreserved within 48 hours of receipt and implanted at a later date (at least 48 hours after cryopreservation). All PDX's were generated from patients diagnosed with squamous cell carcinoma with the exception of PT97 which was a metastatic melanoma as seen in Table 1.

Overall, tumor growth was seen in 70% (95% CI: 35%-93%) of tissues. Three of the patient tissues, did not grow in either condition while the remaining 7 grew in at least one condition. One tumor (UW-SCC-137) grew a SCC from the immediate implant but a lymphoproliferative mass from the cryopreserved tissue. Another, UW-SCC-130, had two distinct masses develop from the cryopreserved specimen. One was a SCC with an appearance similar to the primary and to the immediate implantation specimen while the second demonstrated a lymphoproliferative process. The development of lymphoproliferative masses has been previously described (7,8).

### *Characteristics of resulting PDXs*

Tumors growing in mice were monitored at least weekly. Tumors were harvested when they reached a size of  $>500 \text{ mm}^3$ . We identified no difference between fresh injection and cryopreserved tumors in time from implantation to passage (Figure 1A,  $p=0.53$ ).

H&E sections of the tumor (Figure 1B) were analyzed by a pathologist specializing in head and neck pathology who confirmed the histologic subtype. We assessed extent of tumor necrosis, presence of keratinization, and mitotic activity (Table 2). No significant difference in any of these parameters ( $p=0.12$ ,  $0.34$  and  $0.46$ , respectively) was identified between fresh and cryopreserved injection. Squamous cell carcinomas also had the tumor grade (well, moderately and poorly differentiated) analyzed (Figure 1C). No significant deviations were found in overall tissue morphology or tumor grade between tumors established by the two different methods.

PDXs for which original patient tissue and P1 tissue from both conditions could be procured were STR tested. A high degree of similarity was seen for all patient/PDX pairs (Table 3 and Supplemental Table 1).

## **Discussion**

PDX's have become an integral part of oncology research and are currently used across the spectrum of cancer research ranging from drug development to biomarker analysis (3–5,9–15). While the use of PDX's is expected to continue and expand as PDX lines become further annotated and characterized, the generation, characterization and maintenance of PDX's requires a significant investment of time and resources. Herein, we explored the feasibility of cryopreserving patient tissue prior to implantation. The ultimate goal is to conserve precious resources by allowing tumors to be characterized prior to generating the PDX.

The acquisition of patient tissue within an academic institution involves a highly coordinated effort that begins from the time a patient is diagnosed and extends until after a PDX is established from remnant tissue. At our institution, the workflow begins with the physician or staff identifying a case suitable for donation of remnant cancer tissue. The patient is consented to an IRB approved protocol by a research team member. The surgical team is notified, patient tissue is collected in saline (not formalin) and given to surgical pathology. Pathology provides confirmation of diagnosis and staging while also allocating tissue to the biobank and research teams. The tissue is retrieved from the biobank and processed for implantation and/or cryopreservation. We have previously shown that tumor should be processed within 48 hours of harvest to maximize the efficiency of establishing xenografts (5). Mice are regularly observed for tumor growth and animal health and when a tumor develops, it must be passaged and/or cryopreserved. Simultaneously, various analyses can be performed on remnant tissue to help the investigator identify the optimal PDX for a specific question. These studies can include simple histologic analysis, immunohistochemistry, in situ hybridization, targeted or untargeted gene sequencing, among other tests. By immediately cryopreserving samples these analyses can be performed prior to implantation of the tumor thus saving the resources that would otherwise be used to establish PDXs which may never be used experimentally.

We saw no negative impact of an immediate cryopreservation approach. For most PDXs, tumors developed from both fresh and cryopreserved tissues. Lymphoproliferative masses grew from both fresh implantation and cryopreserved tumors. The overall histology did not otherwise differ between approaches and the time from implantation to passage demonstrated greater patient-to-patient heterogeneity than approach-based differences.

We acknowledge clear limitations to this work. Most notably, due to the interests of our lab, we utilized only samples from patients with malignancies of the head and neck. Whether our results translate to other malignancies requires further study. Hernandez and colleagues

assessed a similar approach in hepatobiliary and pancreatic cancers and demonstrated similar findings (16) suggesting that this approach is likely to work in a wide variety of cancer types. In addition, while we have focused on the potential benefits of cryopreserving samples prior to implantation, we acknowledge that this requires us to perform our characterization on a cohort of patients whose tumors may never establish PDXs. If characterization involves clinically appropriate testing, costs for this might be defrayed. However, for those cases requiring non-clinical analysis, some percentage of samples may be analyzed and ultimately be unable to be reanimated into PDXs.

In conclusion, we have demonstrated that it is feasible to cryopreserve fresh patient tissue to be used at a later timepoint to generate PDXs. This provides an option by which investigators can establish large libraries of potential PDXs which can be animated at the time they are needed rather than only when they are obtained. This may allow investigators to more quickly establish diverse and comprehensive libraries, encourage resource sharing, and accelerate discovery.



## Figures

**Figure 1. Comparison between immediate and cryopreserved implantation of tumor tissue. A)** Time from tumor implantation to first passage (when tumor reached a size of 500mm<sup>3</sup>) was not different ( $p=0.53$ ). Each color represents a different PDX. **B)** Hematoxylin and eosin stained paraffin sections (Magnification 10x). **C)** Matrix table comparing tumor grade of patient tissue between conditions, as scored by a pathologist.

## Tables

**Table 1. PDX establishment success by condition and patient characteristics.**

**Table 2. Comparison of histologic parameters between fresh and cryopreserved PDXs.**

**Table 3. Stability of STR profile.** Percent Match Algorithm showing percentage of allele match between original patient tissue and P1 of fresh and cryopreserved patient tissue. Samples with no growth not included.

**Supplemental Table 1.** Detailed STR profiles of patient and PDX from fresh or cryopreserved growth.



## References

1. Hidalgo M, Amant F, Biankin AV, Budinska E, Byrne AT, Caldas C, et al. Patient-derived xenograft models: an emerging platform for translational cancer research. *Cancer Discov.* 2014 Sep;4(9):998–1013.
2. Karamboulas C, Bruce JP, Hope AJ, Meens J, Huang SH, Erdmann N, et al. Patient-Derived Xenografts for Prognostication and Personalized Treatment for Head and Neck Squamous Cell Carcinoma. *Cell Rep.* 2018 Oct 30;25(5):1318-1331 e4.
3. Kimple RJ, Harari PM, Torres AD, Yang RZ, Soriano BJ, Yu M, et al. Development and characterization of HPV-positive and HPV-negative head and neck squamous cell carcinoma tumorgrafts. *Clin Cancer Res.* 2013 Feb 15;19(4):855–64.
4. Swick AD, Stein AP, McCulloch TM, Hartig GK, Ong IM, Sampene E, et al. Defining the boundaries and expanding the utility of head and neck cancer patient derived xenografts. *Oral Oncol.* 2017 Jan;64:65–72.
5. Stein AP, Saha S, Liu CZ, Hartig GK, Lambert PF, Kimple RJ. Influence of handling conditions on the establishment and propagation of head and neck cancer patient derived xenografts. *PLoS One.* 2014;9(6):e100995.
6. Capes-Davis A, Reid YA, Kline MC, Storts DR, Strauss E, Dirks WG, et al. Match criteria for human cell line authentication: where do we draw the line? *Int J Cancer.* 2013 Jun 1;132(11):2510–9.
7. Dieter SM, Giessler KM, Kriegsmann M, Dubash TD, Möhrmann L, Schulz ER, et al. Patient-derived xenografts of gastrointestinal cancers are susceptible to rapid and delayed B-lymphoproliferation. *Int J Cancer.* 2017 15;140(6):1356–63.
8. Leiting JL, Hernandez MC, Yang L, Bergquist JR, Ivanics T, Graham RP, et al. Rituximab Decreases Lymphoproliferative Tumor Formation in Hepatopancreaticobiliary and Gastrointestinal Cancer Patient-Derived Xenografts. *Sci Rep.* 2019 Apr 11;9(1):5901.
9. Prabakaran PJ, Javaid AM, Swick AD, Werner LR, Nickel KP, Sampene E, et al. Radiosensitization of Adenoid Cystic Carcinoma with MDM2 Inhibition. *Clin Cancer Res.* 2017 Oct 15;23(20):6044–53.

10. Morelli MP, Calvo E, Ordoñez E, Wick MJ, Viqueira B-R, Lopez-Casas PP, et al. Prioritizing phase I treatment options through preclinical testing on personalized tumorgraft. *J Clin Oncol*. 2012 Feb 1;30(4):e45-48.
11. Keysar SB, Astling DP, Anderson RT, Vogler BW, Bowles DW, Morton JJ, et al. A patient tumor transplant model of squamous cell cancer identifies PI3K inhibitors as candidate therapeutics in defined molecular bins. *Molecular oncology*. 2013 Aug;7(4):776–90.
12. Hidalgo M, Bruckheimer E, Rajeshkumar NV, Garrido-Laguna I, De Oliveira E, Rubio-Viqueira B, et al. A pilot clinical study of treatment guided by personalized tumorgrafts in patients with advanced cancer. *Mol Cancer Ther*. 2011 Aug;10(8):1311–6.
13. DeRose YS, Wang G, Lin Y-C, Bernard PS, Buys SS, Ebbert MTW, et al. Tumor grafts derived from women with breast cancer authentically reflect tumor pathology, growth, metastasis and disease outcomes. *Nat Med*. 2011 Oct 23;17(11):1514–20.
14. Dong X, Guan J, English JC, Flint J, Yee J, Evans K, et al. Patient-derived first generation xenografts of non-small cell lung cancers: promising tools for predicting drug responses for personalized chemotherapy. *Clin Cancer Res*. 2010 Mar 1;16(5):1442–51.
15. Pérez-Torras S, Vidal-Pla A, Miquel R, Almendro V, Fernández-Cruz L, Navarro S, et al. Characterization of human pancreatic orthotopic tumor xenografts suitable for drug screening. *Cell Oncol (Dordr)*. 2011 Dec;34(6):511–21.
16. Hernandez MC, Yang L, Leiting JL, Sugihara T, Bergquist JR, Ivanics T, et al. Successful Secondary Engraftment of Pancreatic Ductal Adenocarcinoma and Cholangiocarcinoma Patient-Derived Xenografts After Previous Failed Primary Engraftment. *Transl Oncol*. 2019 Jan;12(1):69–75.

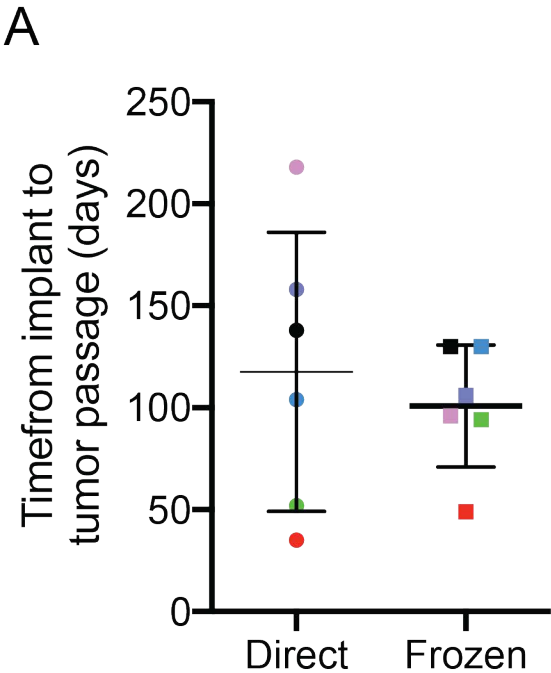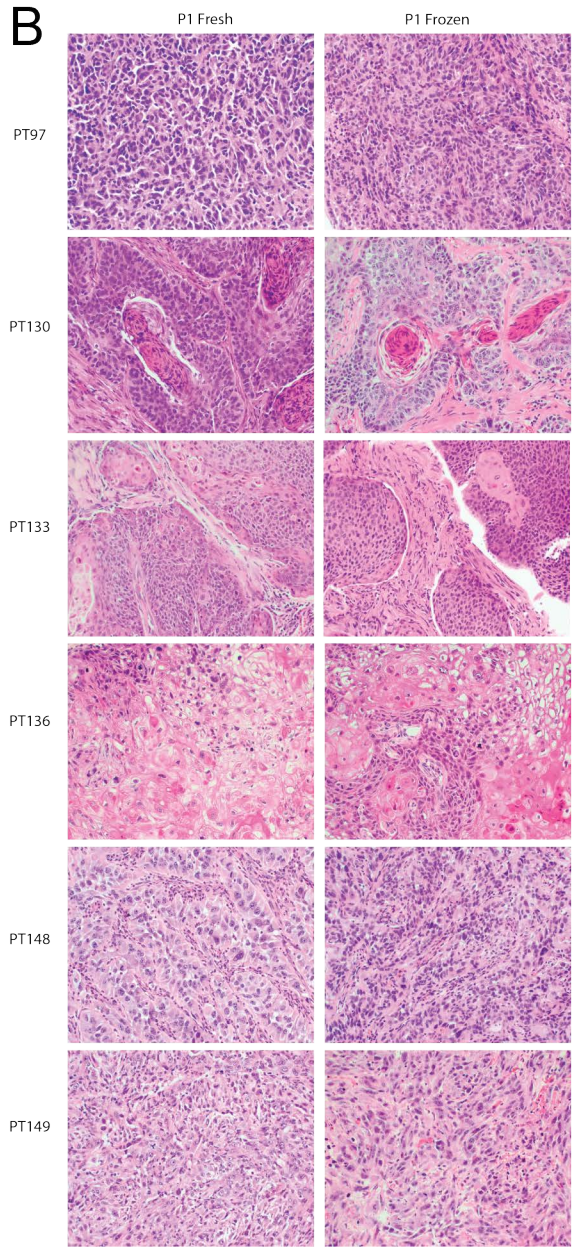

**C**

|               |          | Fresh Tissue |          |      |
|---------------|----------|--------------|----------|------|
|               |          | Well         | Moderate | Poor |
| Frozen Tissue | Well     | 1            | 0        | 0    |
|               | Moderate | 0            | 2        | 0    |
|               | Poor     | 0            | 0        | 3    |

Table 1. PDX establishment success by condition and patient characteristics.

| Patient    | Implantation Conditions:<br>Growth Observed |               | Patient Data |                    |                  |                                                |     |     |                 |            |                  |
|------------|---------------------------------------------|---------------|--------------|--------------------|------------------|------------------------------------------------|-----|-----|-----------------|------------|------------------|
|            | Fresh                                       | Cryopreserved | HPV Status   | Primary tumor type | Origin of Tissue | Diagnosis                                      | Sex | Age | Tobacco History | Metastatic | Original staging |
| UW-SCC-97  | Yes                                         | Yes           | -            | Skin               | Lymph node       | Melanoma                                       | F   | 71  | No              | Yes        | NA               |
| UW-SCC-100 | No                                          | No            | unknown      | Tongue             | Tongue           | Squamous cell carcinoma                        | M   | 50  | No              | No         | pT2N2b           |
| UW-SCC-102 | No                                          | No            | +            | Tongue             | Tongue           | Squamous cell carcinoma                        | M   | 60  | Yes             | No         | pT2N1            |
| UW-SCC-103 | No                                          | No            | -            | Floor of Mouth     | Floor of Mouth   | Squamous cell carcinoma                        | M   | 57  | Yes             | No         | pT4aN0           |
| UW-SCC-130 | Yes                                         | Yes           | -            | Skin               | Parotid gland    | Metastatic squamous cell carcinoma             | M   | 85  | No              | Yes        | TxN2bM0          |
| UW-SCC-133 | Yes                                         | Yes           | +            | Base of Tongue     | Tongue           | Recurrent invasive squamous cell carcinoma     | M   | 69  | Yes             | No         | pT4NxMx          |
| UW-SCC-136 | Yes                                         | Yes           | -            | Hypopharynx        | Hypopharynx      | Squamous Cell Carcinoma                        | M   | 59  | Yes             | No         | T2N1M0           |
| UW-SCC-137 | Yes                                         | No*           | -            | Nasal Cavity       | Ethmoid Sinus    | Poorly Differentiated Carcinoma                | M   | 77  | No              | No         | pT4b             |
| UW-SCC-148 | Yes                                         | Yes           | -            | Unknown primary    | Lymph Node       | Poorly Differentiated Squamous Cell Carcinoma  | M   | 60  | Yes             | Yes        | TxN3M0           |
| UW-SCC-149 | Yes                                         | Yes           | -            | Skin               | Lymph node       | Squamous cell carcinoma/spindle cell carcinoma | F   | 71  | Yes             | Yes        | pT2NxMx          |

\*No invasive SCC developed, cryopreserved tissue developed a lymphoproliferative mass

Table 2. Comparison of histologic parameters between fresh and cryopreserved PDXs.

| PT #          | Method        | Keratin pearl | Mitosis (10 HPF) | Necrosis (%) |
|---------------|---------------|---------------|------------------|--------------|
| PT97          | Fresh         | 0             | 26               | 5            |
|               | Cryopreserved | 0             | 47               | 60           |
| PT130         | Fresh         | 10            | 24               | 20           |
|               | Cryopreserved | 10            | 4                | 10           |
| PT133         | Fresh         | 10            | 22               | <5           |
|               | Cryopreserved | 10            | 46               | 15           |
| PT136         | Fresh         | 80            | 5                | <5           |
|               | Cryopreserved | 60            | 10               | <5           |
| PT137         | Fresh         | 0             | 27               | <5           |
|               | Cryopreserved | N/A           | N/A              | N/A          |
| PT148         | Fresh         | 0             | 16               | <5           |
|               | Cryopreserved | 0             | 16               | <5           |
| PT149         | Fresh         | 0             | 28               | 10           |
|               | Cryopreserved | 0             | 31               | 60           |
| Paired t-test |               | p=0.34        | p=0.46           | p=0.12       |

**Table 3. Stability of STR profile.** Percent Match Algorithm showing percentage of allele match between original patient tissue and P1 of fresh and cryopreserved patient tissue. Samples with no growth excluded.

| Condition     | Patient (Percent Match Algorithm %) |            |            |            |                     |            |            |
|---------------|-------------------------------------|------------|------------|------------|---------------------|------------|------------|
|               | UW-SCC-97                           | UW-SCC-130 | UW-SCC-133 | UW-SCC-136 | UW-SCC-137          | UW-SCC-148 | UW-SCC-149 |
| Fresh         | 100                                 | 100        | 100        | 100**      |                     | 100        | 96         |
| Cryopreserved | 100                                 | 100        | 100        | 100**      | lymphoproliferative | *79        | 96         |

\* PT148 frozen tissue was from P2 rather than P1

\*\*No patient tissue was available for STR analysis so match shown is between Fresh and Cryopreserved samples.



Supplemental Table 1. Detailed STR profiles of patient and PDX from fresh or cryopreserved growth.

|                                              | PT97       |            |           | PT130          |            |                | PT133      |            |            | PT136     |            |           | PT137     |            |           | PT148      |            |             | PT149     |            |           |
|----------------------------------------------|------------|------------|-----------|----------------|------------|----------------|------------|------------|------------|-----------|------------|-----------|-----------|------------|-----------|------------|------------|-------------|-----------|------------|-----------|
|                                              | Patient    | P1 (Fresh) | P1 (Cryo) | Patient        | P1 (Fresh) | P1 (Cryo)      | Patient    | P1 (Fresh) | P1 (Cryo)  | Patient   | P1 (Fresh) | P1 (Cryo) | Patient   | P1 (Fresh) | P1 (Cryo) | Patient    | P1 (Fresh) | P1 (Cryo)   | Patient   | P1 (Fresh) | P1 (Cryo) |
| D3S1358                                      | 16         | 16         | 16        | 14,16          | 16         | 14,16          | 15,16      | 16         | 15,16      | NA        | 15         | 15        | NA        | NA         | NA        | 16,18      | 16,18      | 16,18       | 15,16     | 15,16      | 15,16     |
| D21S11                                       | 30,31      | 30,31      | 30,31     | 28, 32.2, 33.2 | 28, 33.2   | 28, 32.2, 33.2 | 31.2, 32.2 | 31.2, 32.2 | 31.2, 32.2 | NA        | 29, 31.2   | 29, 31.2  | NA        | NA         | NA        | 30, 30.2   | 30, 30.2   | 30, 30.2    | 29        | 29         | 29        |
| D18S51                                       | 13         | 13         | 13        | 14,17          | 14,17      | 14,17          | 15,16      | 15,16      | 15,16      | NA        | 16,20      | 16,20     | NA        | NA         | NA        | 15,19      | 15,19      | 15,18,19,22 | 14,16     | 14,16      | 14,16     |
| Penta E                                      | 5,12       | 5,12       | 12        | 7,12           | 7          | 7,12           | 7,12       | 7,12       | 7,12       | NA        | 5,7        | 5,7       | NA        | NA         | NA        | 7          | 7          | 5,7         | 13,17     | 13,17      | 13        |
| Penta D                                      | 10,16      | 10,16      | 10,16     | 11,12          | 11,12      | 11,12          | 9,12       | 9,12       | 9,12       | NA        | 10,11      | 10,11     | NA        | NA         | NA        | 9,12       | 9,12       | 9,11,12     | 11,12     | 11         | 11        |
| D8S1179                                      | 13         | 13         | 13        | 9,13           | 13         | 13             | 10,13      | 10,13      | 10,13      | NA        | 13,15      | 13,15     | NA        | NA         | NA        | 12         | 12         | 12          | 13        | 13         | 13        |
| FGA                                          | 20,21      | 20,21      | 20,21     | 20,21          | 20         | 20,21          | 21,23      | 21,23      | 21,23      | NA        | 22         | 22        | NA        | NA         | NA        | 20,22      | 20,22      | 20,22       | 22,24     | 22,24      | 22,24     |
| D5S818                                       | 11,12      | 11,12      | 11,12     | 11             | 11         | 11             | 9,12       | 9,12       | 9,12       | NA        | 11         | 11        | NA        | NA         | NA        | 12,13      | 12,13      | 12,13       | 12,13     | 12,13      | 12,13     |
| D13S317                                      | 9          | 9,11       | 11        | 12,14          | 12,14      | 12,14          | 8,11       | 11         | 11         | NA        | 8          | 8         | NA        | NA         | NA        | 11         | 11         | 11          | 11,12     | 12         | 12        |
| D7S820                                       | 9,11       | 9,11       | 9,11      | 9,10           | 9,10       | 9,10           | 12,13      | 12,13      | 12,13      | NA        | 11,12      | 11,12     | NA        | NA         | NA        | 10         | 10         | 10          | 10        | 10         | 10        |
| D16S539                                      | 9,12       | 9,12       | 9,12      | 10,12          | 12         | 10,12          | 12,13      | 12         | 12         | NA        | 12,13      | 12,13     | NA        | NA         | NA        | 11,13      | 11,13      | 9,11,13     | 8,11      | 8,11       | 8,11      |
| vWA                                          | 15,16      | 15,16      | 15,16     | 17,18          | 17,18      | 17,18          | 14,18      | 14,18      | 14,18      | NA        | 17,20      | 17,20     | NA        | NA         | NA        | 16,17      | 16,17      | 14,16,17    | 17,18     | 17,18      | 17,18     |
| THO1                                         | 6,7        | 6,7        | 6,7       | 8,9            | 9          | 8,9            | 6,9        | 6,9        | 6,9        | NA        | 9,3        | 9,3       | NA        | NA         | NA        | 6,9,3      | 6,9,3      | 6,9,3       | 6,9,3     | 6,9,3      | 6,9,3     |
| Amelogenin                                   | X          | X          | X         | X,Y            | X          | X,Y            | X,Y        | X,Y        | X,Y        | NA        | X,Y        | X,Y       | NA        | NA         | NA        | X,Y        | X,Y        | X           | X         | X          | X         |
| TPOX                                         | 8          | 8          | 8         | 8,11           | 8,11       | 8,11           | 10         | 10         | 10         | NA        | 11         | 11        | NA        | NA         | NA        | 8          | 8          | 8           | 8,11      | 8,11       | 8,11      |
| CSF1PO                                       | 12         | 12         | 12        | 10,12          | 10         | 10,12          | 10         | 10         | 10         | NA        | 12         | 12        | NA        | NA         | NA        | 10,12      | 10,12      | 10,11,12    | 9,11      | 9,10,11    | 9,11      |
| <b>Percent Match Algorithm Patient to P1</b> | <b>100</b> | <b>100</b> |           | <b>100</b>     | <b>100</b> |                | <b>100</b> | <b>100</b> |            | <b>NA</b> | <b>100</b> |           | <b>NA</b> | <b>NA</b>  | <b>NA</b> | <b>100</b> | <b>79</b>  |             | <b>96</b> | <b>96</b>  |           |
